# Supplementary material for: A new species of Petrochromis (Perciformes: Cichlidae) from Lake Tanganyika
Source: Springer Nature journal article supplement (doi:10.1007/s10228-014-0396-9), 2014-04-04
Supplement: MOESM1 [file 10228_2014_396_MOESM1_ESM.pdf]

Table S1 Samples used for the morphological analysis

| Species                          | Catalogue no.      | Locality                                       | Depth (m) | Type     | Sex    | Standard length (mm) | Body depth (mm) | Head length (mm) | Caudal-pectuncle length (mm) | Caudal-pectuncle depth (mm) | Dorsal-fin-base length (mm) | Anal-fin-base length (mm) | Pectoral-fin length (mm) | Pelvic-fin length (mm) | Shortest caudal-fin-ray length (mm) | Longest caudal-fin-ray length (mm) | Head width (mm) | Snout length (mm) | Eye length (mm) | Interorbital width (mm) | Lower-jaw length (mm) | Upper-jaw protrusion (mm) | Length of LPJ (mm) | Width of LPJ (mm) | Length of dentigerous area on LPJ (mm) | Width of dentigerous area on LPJ (mm) | Dorsal-fin spines | Dorsal-fin soft rays | Anal-fin spines | Anal-fin soft rays | Pectoral-fin soft rays | Scales in longitudinal line | Scales on upper lateral line | Scales on lower lateral line | Scale rows between lateral lines | Gill rakers on first ceratobranchial |
|----------------------------------|--------------------|------------------------------------------------|-----------|----------|--------|----------------------|-----------------|------------------|------------------------------|-----------------------------|-----------------------------|---------------------------|--------------------------|------------------------|-------------------------------------|------------------------------------|-----------------|-------------------|-----------------|-------------------------|-----------------------|---------------------------|--------------------|-------------------|----------------------------------------|---------------------------------------|-------------------|----------------------|-----------------|--------------------|------------------------|-----------------------------|------------------------------|------------------------------|----------------------------------|--------------------------------------|
| <i>Petrochromis horii</i> n. sp. | MRAC B3-03-P-01    | Kasenga, Zambia                                | 13        | Holotype | Female | 137.6                | 59.5            | 47.4             | 20.3                         | 18.1                        | 83.2                        | 22.8                      | 46.2                     | 46.7                   | 29.8                                | 40.9                               | 24.9            | 21.0              | 13.1            | 18.1                    | 14.7                  | 0.3                       | —                  | —                 | —                                      | —                                     | 19                | 9                    | 3               | 7                  | 16                     | 34                          | 24                           | 14                           | 2                                | 11                                   |
| <i>Petrochromis horii</i> n. sp. | MRAC B3-03-P-02    | Kasenga, Zambia                                | 13        | Paratype | Female | 85.0                 | 37.1            | 28.3             | 12.5                         | 12.7                        | 53.3                        | 16.2                      | 30.2                     | 31.3                   | 19.9                                | 24.4                               | 15.4            | 11.4              | 8.3             | 10.7                    | 8.0                   | 1.1                       | —                  | —                 | —                                      | —                                     | 18                | 10                   | 3               | 8                  | 16                     | 34                          | 25                           | 14                           | 2                                | 12                                   |
| <i>Petrochromis horii</i> n. sp. | MRAC B3-03-P-03    | Kasenga, Zambia                                | 13        | Paratype | Female | 105.7                | 47.7            | 35.6             | 16.0                         | 14.8                        | 67.1                        | 19.3                      | 39.2                     | 43.8                   | 26.1                                | 34.1                               | 20.4            | 15.0              | 10.2            | 13.9                    | 10.5                  | 0.7                       | —                  | —                 | —                                      | —                                     | 18                | 10                   | 3               | 8                  | 16                     | 34                          | 23                           | 10                           | 2                                | 12                                   |
| <i>Petrochromis horii</i> n. sp. | MRAC B3-03-P-04    | Kasenga, Zambia                                | 13        | Paratype | Male   | 100.7                | 44.7            | 33.8             | 14.7                         | 14.0                        | 62.6                        | 17.8                      | 36.3                     | 42.6                   | 24.0                                | 29.8                               | 18.6            | 13.8              | 9.9             | 13.6                    | 8.8                   | 1.4                       | —                  | —                 | —                                      | —                                     | 18                | 10                   | 3               | 8                  | 16                     | 34                          | 23                           | 14                           | 2                                | 12                                   |
| <i>Petrochromis horii</i> n. sp. | MRAC B3-03-P-05    | Kasenga, Zambia                                | 15        | Paratype | Female | 128.3                | 53.5            | 42.2             | 19.9                         | 16.6                        | 80.3                        | 23.4                      | 45.0                     | 51.5                   | 29.6                                | 40.6                               | 23.0            | 17.2              | 11.7            | 15.6                    | 14.0                  | 1.1                       | 14.83              | 12.63             | 6.80                                   | 10.13                                 | 18                | 10                   | 3               | 7                  | 15                     | 35                          | 25                           | 15                           | 2                                | 11                                   |
| <i>Petrochromis horii</i> n. sp. | MRAC B3-03-P-06    | Kasenga, Zambia                                | 14        | Paratype | Female | 116.6                | 51.7            | 39.0             | 17.2                         | 16.0                        | 75.5                        | 22.2                      | 38.9                     | 42.7                   | 26.0                                | 34.4                               | 22.2            | 16.2              | 10.5            | 15.0                    | 12.0                  | 1.2                       | —                  | —                 | —                                      | —                                     | 19                | 9                    | 3               | 8                  | 16                     | 34                          | 24                           | 16                           | 2                                | 13                                   |
| <i>Petrochromis horii</i> n. sp. | MRAC B3-03-P-07    | Kasenga, Zambia                                | 14        | Paratype | Female | 100.4                | 45.7            | 31.7             | 15.5                         | 13.5                        | 64.1                        | 20.0                      | 33.9                     | 39.5                   | 23.6                                | 30.7                               | 19.3            | 12.8              | 9.1             | 12.2                    | 9.1                   | 1.3                       | —                  | —                 | —                                      | —                                     | 19                | 9                    | 3               | 8                  | 15                     | 34                          | 24                           | 14                           | 2                                | 12                                   |
| <i>Petrochromis horii</i> n. sp. | BMNH 2013.2.13.1   | Kasenga, Zambia                                | 14        | Paratype | Male   | 104.4                | 44.5            | 33.6             | 15.0                         | 14.1                        | 66.5                        | 19.4                      | 35.5                     | 43.0                   | 24.6                                | 32.1                               | 20.1            | 13.8              | 9.6             | 12.7                    | 9.4                   | 1.3                       | —                  | —                 | —                                      | —                                     | 19                | 9                    | 3               | 8                  | 16                     | 34                          | 24                           | 13                           | 2                                | 12                                   |
| <i>Petrochromis horii</i> n. sp. | BMNH 2013.2.13.2   | Kasenga, Zambia                                | 14        | Paratype | Male   | 100.1                | 42.3            | 31.6             | 14.6                         | 13.0                        | 62.4                        | 18.7                      | 34.6                     | 39.7                   | 24.4                                | 30.2                               | 18.5            | 13.3              | 9.0             | 12.2                    | 8.2                   | 1.1                       | —                  | —                 | —                                      | —                                     | 19                | 10                   | 3               | 8                  | 16                     | 34                          | 24                           | 14                           | 2                                | 11                                   |
| <i>Petrochromis horii</i> n. sp. | BMNH 2013.2.13.3   | Kasenga, Zambia                                | 14        | Paratype | Female | 130.3                | 53.4            | 41.6             | 20.2                         | 16.6                        | 81.6                        | 24.4                      | 40.0                     | 47.8                   | 27.4                                | 35.5                               | 24.0            | 18.0              | 11.2            | 16.8                    | 12.0                  | 0.4                       | —                  | —                 | —                                      | —                                     | 18                | 10                   | 3               | 8                  | 16                     | 34                          | 24                           | 14                           | 2                                | 11                                   |
| <i>Petrochromis horii</i> n. sp. | BMNH 2013.2.13.4   | Kasenga, Zambia                                | 14        | Paratype | Male   | 89.1                 | 38.1            | 28.2             | 14.0                         | 12.1                        | 56.8                        | 16.1                      | 31.2                     | 30.7                   | 21.5                                | 26.0                               | 16.6            | 11.7              | 8.5             | 10.7                    | 8.1                   | 1.3                       | —                  | —                 | —                                      | —                                     | 19                | 9                    | 3               | 8                  | 16                     | 35                          | 26                           | 14                           | 2                                | 11                                   |
| <i>Petrochromis horii</i> n. sp. | BMNH 2013.2.13.5   | Kasenga, Zambia                                | 14        | Paratype | Female | 105.7                | 46.0            | 34.0             | 16.6                         | 14.0                        | 65.2                        | 18.5                      | 33.2                     | 41.2                   | 24.6                                | 30.2                               | 19.8            | 14.4              | 10.0            | 12.9                    | 9.0                   | 0.8                       | —                  | —                 | —                                      | —                                     | 19                | 10                   | 3               | 7                  | 16                     | 35                          | 24                           | 13                           | 2                                | 12                                   |
| <i>Petrochromis famula</i>       | BMNH 1950.4.1:7636 | Lake Tanganyika                                | —         | Holotype | Male   | 122.2                | 50.8            | 40.6             | 16.3                         | 14.3                        | 78.4                        | 23.5                      | 42.8                     | 42.2                   | 25.7                                | 27.7                               | 21.7            | 17.5              | 10.5            | 15.3                    | 12.5                  | 0.5                       | —                  | —                 | —                                      | —                                     | 18                | 10                   | 3               | 8                  | 14                     | 32                          | 22                           | 10                           | 2                                | 12                                   |
| <i>Petrochromis famula</i>       | BMNH 1950.4.1:7640 | Lake Tanganyika                                | —         | Paratype | Male   | 115.7                | 47.8            | 39.6             | 15.3                         | 14.9                        | 74.0                        | 22.5                      | 44.3                     | 39.3                   | 25.0                                | 27.2                               | 19.3            | 17.8              | 9.9             | 14.3                    | 11.6                  | 1.0                       | —                  | —                 | —                                      | —                                     | 18                | 9                    | 3               | 8                  | 16                     | 33                          | 22                           | 13                           | 2                                | 12                                   |
| <i>Petrochromis famula</i>       | BMNH 1950.4.1:7641 | Lake Tanganyika                                | —         | Paratype | Male   | 121.1                | 49.2            | 42.3             | 16.3                         | 15.1                        | 76.2                        | 24.5                      | 42.8                     | 35.0                   | 26.7                                | 29.0                               | 20.7            | 18.4              | 9.4             | 14.1                    | 13.3                  | 1.3                       | —                  | —                 | —                                      | —                                     | 18                | 10                   | 3               | 9                  | 15                     | 33                          | 23                           | 12                           | 2                                | 11                                   |
| <i>Petrochromis famula</i>       | MRAC 131113        | Kabimba, D. R. Congo                           | —         | Non-type | Male   | 115.7                | 50.1            | 38.9             | 17.7                         | 14.7                        | 70.2                        | 20.1                      | 41.6                     | 48.4                   | 25.8                                | 27.5                               | 22.1            | 18.0              | 9.5             | 14.2                    | 12.1                  | 0.6                       | —                  | —                 | —                                      | —                                     | 18                | 9                    | 3               | 8                  | 16                     | 32                          | 22                           | 11                           | 2                                | 11                                   |
| <i>Petrochromis famula</i>       | MRAC 131114        | Kabimba, D. R. Congo                           | —         | Non-type | Male   | 111.6                | 48.2            | 38.2             | 16.5                         | 13.1                        | 69.5                        | 22.1                      | 41.3                     | 38.0                   | 25.0                                | 26.3                               | 21.4            | 16.9              | 9.8             | 13.6                    | 11.3                  | 1.1                       | —                  | —                 | —                                      | —                                     | 18                | 9                    | 3               | 8                  | 15                     | 31                          | 22                           | 9                            | 2                                | 12                                   |
| <i>Petrochromis famula</i>       | MRAC 131115        | Kabimba, D. R. Congo                           | —         | Non-type | Male   | 102.0                | 41.9            | 32.5             | 14.1                         | 12.1                        | 62.9                        | 18.8                      | 35.5                     | 35.6                   | 22.0                                | 23.5                               | 18.8            | 13.7              | 8.0             | 11.7                    | 9.5                   | 0.3                       | —                  | —                 | —                                      | —                                     | 18                | 10                   | 3               | 8                  | 15                     | 32                          | 23                           | 12                           | 2                                | 11                                   |
| <i>Petrochromis famula</i>       | HUMZ 116502        | Pemba, D. R. Congo                             | —         | Non-type | Female | 90.8                 | 40.9            | 33.0             | 11.0                         | 11.5                        | 55.2                        | 16.9                      | 33.5                     | 30.3                   | 21.4                                | 22.6                               | 17.4            | 14.1              | 8.9             | 11.6                    | 9.7                   | 0.8                       | —                  | —                 | —                                      | —                                     | 18                | 9                    | 3               | 8                  | 15                     | 31                          | 22                           | 9                            | 2                                | 12                                   |
| <i>Petrochromis famula</i>       | HUMZ 118085        | Pemba, D. R. Congo                             | —         | Non-type | Female | 95.7                 | 39.5            | 33.0             | 11.0                         | 11.0                        | 57.8                        | 16.6                      | 32.9                     | 29.5                   | 21.5                                | 22.7                               | 17.5            | 13.3              | 8.8             | 11.9                    | 10.3                  | 0.3                       | —                  | —                 | —                                      | —                                     | 18                | 9                    | 3               | 8                  | 15                     | 32                          | 23                           | 10                           | 2                                | 12                                   |
| <i>Petrochromis famula</i>       | HUMZ 127712        | Muzimu, D. R. Congo                            | 5         | Non-type | Male   | 97.6                 | 39.5            | 32.3             | 12.5                         | 11.5                        | 59.7                        | 18.3                      | 33.7                     | 38.5                   | 22.8                                | 24.5                               | 17.4            | 14.1              | 8.4             | 11.3                    | 8.3                   | 0.8                       | —                  | —                 | —                                      | —                                     | 19                | 9                    | 3               | 8                  | 16                     | 32                          | 23                           | 11                           | 2                                | 12                                   |
| <i>Petrochromis famula</i>       | HUMZ 127713        | Muzimu, D. R. Congo                            | 5         | Non-type | Female | 84.7                 | 37.7            | 30.2             | 9.7                          | 10.5                        | 52.1                        | 14.8                      | 33.3                     | 26.6                   | 20.8                                | 21.5                               | 16.2            | 13.3              | 8.5             | 10.3                    | 8.1                   | 1.0                       | —                  | —                 | —                                      | —                                     | 18                | 9                    | 3               | 8                  | 15                     | 32                          | 23                           | 10                           | 2                                | 12                                   |
| <i>Petrochromis famula</i>       | Zm 465-a           | Kasenga, Zambia                                | 1.5-2     | Non-type | Female | 94.6                 | 41.3            | 32.9             | 13.3                         | 12.3                        | 59.7                        | 16.7                      | 32.5                     | 31.4                   | 21.5                                | 22.6                               | 16.9            | 14.0              | 8.2             | 11.1                    | 9.3                   | 0.6                       | —                  | —                 | —                                      | —                                     | 19                | 8                    | 3               | 7                  | 15                     | 33                          | 24                           | 12                           | 2                                | 14                                   |
| <i>Petrochromis famula</i>       | Zm 465-b           | Kasenga, Zambia                                | 1.5-2     | Non-type | Female | 90.1                 | 40.0            | 31.5             | 12.2                         | 12.2                        | 55.1                        | 15.9                      | 31.7                     | 28.1                   | 20.5                                | 22.0                               | 16.7            | 13.0              | 8.5             | 10.6                    | 9.6                   | 0.3                       | —                  | —                 | —                                      | —                                     | 18                | 8                    | 3               | 7                  | 15                     | 32                          | 24                           | 11                           | 2                                | 12                                   |
| <i>Petrochromis famula</i>       | Zm 483-a           | Kasenga, Zambia                                | 1.5       | Non-type | Male   | 101.1                | 45.2            | 34.6             | 13.7                         | 13.5                        | 65.1                        | 19.8                      | 34.4                     | 37.5                   | 23.8                                | 26.3                               | 18.0            | 15.6              | 8.2             | 12.1                    | 9.5                   | 1.0                       | —                  | —                 | —                                      | —                                     | 18                | 9                    | 3               | 8                  | 15                     | 32                          | 22                           | 12                           | 2                                | 11                                   |
| <i>Petrochromis famula</i>       | Zm 483-b           | Kasenga, Zambia                                | 1.5       | Non-type | Male   | 99.0                 | 41.8            | 33.7             | 14.8                         | 13.3                        | 61.6                        | 18.2                      | 29.8                     | 29.3                   | 21.5                                | 23.4                               | 17.4            | 14.5              | 8.1             | 11.5                    | 9.6                   | 0.5                       | —                  | —                 | —                                      | —                                     | 18                | 9                    | 3               | 8                  | 15                     | 32                          | 23                           | 12                           | 2                                | 12                                   |
| <i>Petrochromis famula</i>       | Zm 483-c           | Kasenga, Zambia                                | 1.5       | Non-type | Female | 95.1                 | 40.6            | 33.3             | 12.7                         | 12.2                        | 58.1                        | 16.9                      | 32.3                     | 31.1                   | 21.9                                | 25.0                               | 17.3            | 14.3              | 8.5             | 11.6                    | 9.4                   | 0.8                       | —                  | —                 | —                                      | —                                     | 18                | 9                    | 3               | 8                  | 15                     | 32                          | 22                           | 12                           | 2                                | 12                                   |
| <i>Petrochromis famula</i>       | Zm 483-d           | Kasenga, Zambia                                | 1.5       | Non-type | Female | 92.9                 | 41.1            | 32.6             | 13.0                         | 12.2                        | 57.8                        | 16.8                      | 33.1                     | 29.3                   | 19.9                                | 21.8                               | 17.3            | 14.5              | 8.2             | 11.3                    | 9.2                   | 0.4                       | —                  | —                 | —                                      | —                                     | 18                | 9                    | 3               | 8                  | 15                     | 32                          | 22                           | 12                           | 2                                | 13                                   |
| <i>Petrochromis famula</i>       | Zm 869-a           | Kasenga, Zambia                                | 3-4       | Non-type | Male   | 121.1                | 53.7            | 41.5             | 17.1                         | 16.6                        | 78.5                        | 23.0                      | 44.6                     | 46.6                   | 27.2                                | 30.8                               | 21.6            | 18.7              | 9.5             | 15.6                    | 12.5                  | 1.1                       | —                  | —                 | —                                      | —                                     | 18                | 10                   | 3               | 8                  | 15                     | 33                          | 22                           | 12                           | 2                                | 12                                   |
| <i>Petrochromis famula</i>       | Zm 869-b           | Kasenga, Zambia                                | 3-4       | Non-type | Female | 108.2                | 48.1            | 37.7             | 16.5                         | 14.1                        | 68.3                        | 20.5                      | 36.3                     | 32.7                   | —                                   | —                                  | 19.7            | 16.7              | 10.0            | 13.2                    | 11.8                  | 1.1                       | —                  | —                 | —                                      | —                                     | 18                | 9                    | 3               | 8                  | 15                     | 32                          | 22                           | 10                           | 2                                | 11                                   |
| <i>Petrochromis famula</i>       | Zm 93792-d         | Kasenga, Zambia                                | 1-3       | Non-type | Male   | 126.3                | 53.7            | 45.8             | 17.1                         | 16.1                        | 79.0                        | 22.4                      | 44.8                     | 47.6                   | 30.0                                | 32.0                               | 23.6            | 21.1              | 10.5            | 16.0                    | 14.0                  | 1.5                       | —                  | —                 | —                                      | —                                     | 18                | 9                    | 3               | 8                  | 15                     | 32                          | 22                           | 13                           | 2                                | 12                                   |
| <i>Petrochromis famula</i>       | Zm 93792-e         | Kasenga, Zambia                                | 1-3       | Non-type | Male   | 133.0                | 55.6            | 43.2             | 16.3                         | 16.1                        | 84.6                        | 24.8                      | 46.6                     | 47.0                   | 28.6                                | 32.7                               | 24.0            | 19.2              | 10.0            | 16.5                    | 13.1                  | 1.0                       | —                  | —                 | —                                      | —                                     | 18                | 10                   | 3               | 8                  | 15                     | 33                          | 24                           | 10                           | 2                                | 12                                   |
| <i>Petrochromis fasciolatus</i>  | MRAC 10.749        | devant Kapamba, D. R. Congo                    | —         | Syntype  | Female | 85.3                 | 30.3            | 26.7             | 14.2                         | 9.6                         | 51.4                        | 14.6                      | 27.7                     | 24.0                   | 18.3                                | —                                  | 14.9            | 9.7               | 8.5             | 9.6                     | 10.0                  | -0.8                      | —                  | —                 | —                                      | —                                     | 19                | 8                    | 3               | 7                  | 16                     | 33                          | 23                           | 10                           | 2                                | 13                                   |
| <i>Petrochromis fasciolatus</i>  | MRAC 10.750        | devant Kapamba, D. R. Congo                    | —         | Syntype  | Female | 77.6                 | 29.6            | 25.3             | 12.0                         | 9.2                         | 46.1                        | 14.2                      | 25.8                     | 22.5                   | 16.8                                | 19.0                               | 13.7            | 8.9               | 8.0             | 8.7                     | 8.7                   | -0.8                      | —                  | —                 | —                                      | —                                     | 19                | 9                    | 3               | 8                  | 15                     | 33                          | 24                           | 13                           | 2                                | —                                    |
| <i>Petrochromis fasciolatus</i>  | MRAC 11.695        | baie de Kilewa, devant la Sambala, D. R. Congo | —         | Syntype  | Female | 92.0                 | 31.8            | 29.4             | 14.5                         | 10.4                        | 52.6                        | 16.7                      | 28.8                     | 23.5                   | 18.5                                | 20.7                               | 15.6            | 10.7              | 8.6             | 9.5                     | 9.6                   | -0.9                      | —                  | —                 | —                                      | —                                     | 19                | 9                    | 3               | 8                  | 16                     | 34                          | 24                           | 14                           | 2                                | 13                                   |
| <i>Petrochromis fasciolatus</i>  | MRAC 11.696        | baie de Kilewa, devant la Sambala, D. R. Congo | —         | Syntype  | Female | 95.2                 | 34.1            | 30.2             | 14.9                         | 11.1                        | 55.1                        | 16.9                      | 29.5                     | 25.5                   | 18.5                                | 21.0                               | 16.1            | 11.5              | 9.2             | 10.4                    | 10.0                  | -1.7                      | —                  | —                 | —                                      | —                                     | 18                | 10                   | 3               | 8                  | 16                     | 34                          | 23                           | 12                           | 2                                | 11                                   |
| <i>Petrochromis fasciolatus</i>  | MRAC 106550        | Albertville, D. R. Congo                       | —         | Non-type | Female | 99.1                 | 38.5            | 32.1             | 15.8                         | 11.5                        | 59.8                        | 17.5                      | 32.4                     | 27.4                   | 20.3                                | 23.2                               | 18.2            | 12.1              | 9.3             | 11.2                    | 11.6                  | -0.6                      | —                  | —                 | —                                      | —                                     | 18                | 10                   | 3               | 8                  | 16                     | 34                          | 24                           | 13                           | 2                                | 13                                   |
| <i>Petrochromis fasciolatus</i>  | MRAC 106551        | Albertville, D. R. Congo                       | —         | Non-type | Female | 85.5                 | 33.1            | 28.1             | 12.8                         | 9.8                         | 51.8                        | 15.3                      | 28.7                     | 24.9                   | 19.3                                | 22.5                               | 15.6            | 10.5              | 8.5             | 9.1                     | 9.2                   | -0.6                      | —                  | —                 | —                                      | —                                     | 18                | 10                   | 3               | 8                  | 16                     | 34                          | 25                           | 15                           | 2                                | 11                                   |
| <i>Petrochromis fasciolatus</i>  | MRAC 106552        | Albertville, D. R. Congo                       | —         | Non-type | Male   | 101.3                | 39.3            | 32.2             | 15.9                         | 11.2                        | 60.2                        | 16.3                      | 32.8                     | —                      | 20.9                                | 24.1                               | 18.3            | 12                |                 |                         |                       |                           |                    |                   |                                        |                                       |                   |                      |                 |                    |                        |                             |                              |                              |                                  |                                      |

Table S1 (Continued)

| Species                                  | Catalogue no.   | Locality                                               | Depth (m) | Type     | Sex    | Standard length (mm) | Body depth (mm) | Head length (mm) | Caudal-pectuncle length (mm) | Caudal-pectuncle depth (mm) | Dorsal-fin-base length (mm) | Anal-fin-base length (mm) | Pectoral-fin length (mm) | Pelvic-fin length (mm) | Shortest caudal-fin-ray length (mm) | Longest caudal-fin-ray length (mm) | Head width (mm) | Snout length (mm) | Eye length (mm) | Interorbital width (mm) | Lower-jaw length (mm) | Upper-jaw protrusion (mm) | Length of LPJ (mm) | Width of LPJ (mm) | Length of dentigerous area on LPJ (mm) | Width of dentigerous area on LPJ (mm) | Dorsal-fin spines | Dorsal-fin soft rays | Anal-fin spines | Anal-fin soft rays | Pectoral-fin soft rays | Scales in longitudinal line | Scales on upper lateral line | Scales on lower lateral line | Scale rows between lateral lines | Gill rakers on first ceratobranchial |
|------------------------------------------|-----------------|--------------------------------------------------------|-----------|----------|--------|----------------------|-----------------|------------------|------------------------------|-----------------------------|-----------------------------|---------------------------|--------------------------|------------------------|-------------------------------------|------------------------------------|-----------------|-------------------|-----------------|-------------------------|-----------------------|---------------------------|--------------------|-------------------|----------------------------------------|---------------------------------------|-------------------|----------------------|-----------------|--------------------|------------------------|-----------------------------|------------------------------|------------------------------|----------------------------------|--------------------------------------|
| <i>Petrochromis macrognathus</i>         | Zm 284-c        | Kasenga, Zambia                                        | 2         | Non-type | Female | 87.1                 | 31.2            | 30.2             | 14.0                         | 11.8                        | 50.3                        | 17.1                      | 21.2                     | 22.6                   | 20.1                                | 23.0                               | 14.3            | 12.7              | 8.0             | 8.7                     | 6.5                   | 4.0                       | —                  | —                 | —                                      | —                                     | 18                | 12                   | 3               | 8                  | 17                     | 36                          | 26                           | 15                           | 2                                | 11                                   |
| <i>Petrochromis macrognathus</i>         | Zm 02170        | Kasenga, Zambia                                        | —         | Non-type | Male   | 95.1                 | 34.0            | 32.7             | 14.0                         | 12.5                        | 56.1                        | 18.3                      | 22.9                     | 25.8                   | 21.7                                | 25.3                               | 16.0            | 14.2              | 8.0             | 9.5                     | 7.4                   | 4.0                       | —                  | —                 | —                                      | —                                     | 18                | 11                   | 3               | 9                  | 17                     | 36                          | 25                           | 15                           | 2                                | 11                                   |
| <i>Petrochromis macrognathus</i>         | Zm 02573        | Kasenga, Zambia                                        | —         | Non-type | Male   | 118.9                | 45.1            | 38.0             | 17.5                         | 16.7                        | 70.9                        | 22.8                      | 30.5                     | 35.7                   | 27.4                                | 32.7                               | 22.4            | 16.2              | 9.5             | 12.9                    | 10.7                  | 3.7                       | —                  | —                 | —                                      | —                                     | 18                | 11                   | 3               | 8                  | 17                     | 35                          | 25                           | 14                           | 2                                | 11                                   |
| <i>Petrochromis macrognathus</i>         | Zm 02574        | Kasenga, Zambia                                        | —         | Non-type | Male   | 96.7                 | 35.1            | 32.7             | 14.1                         | 13.4                        | 57.6                        | 20.9                      | 23.8                     | 27.2                   | 22.9                                | 25.5                               | 17.2            | 15.1              | 7.8             | 10.9                    | 7.6                   | 3.9                       | —                  | —                 | —                                      | —                                     | 18                | 12                   | 3               | 9                  | 16                     | 35                          | 24                           | 14                           | 2                                | 12                                   |
| <i>Petrochromis macrognathus</i>         | Zm 02578        | Kasenga, Zambia                                        | —         | Non-type | Female | 110.9                | 40.5            | 37.1             | 17.1                         | 14.7                        | 65.7                        | 23.1                      | 28.2                     | 27.4                   | 25.7                                | 29.6                               | 19.2            | 16.7              | 8.8             | 12.4                    | 9.9                   | 3.5                       | —                  | —                 | —                                      | —                                     | 18                | 11                   | 3               | 8                  | 16                     | 35                          | 26                           | 14                           | 2                                | 12                                   |
| <i>Petrochromis macrognathus</i>         | Zm 02579        | Kasenga, Zambia                                        | —         | Non-type | Female | 120.1                | 43.6            | 39.0             | 19.0                         | 16.5                        | 72.4                        | 24.0                      | 31.7                     | 34.9                   | 27.5                                | 31.3                               | 21.2            | 17.4              | 9.7             | 13.2                    | 10.4                  | 2.5                       | —                  | —                 | —                                      | —                                     | 18                | 11                   | 3               | 8                  | 16                     | 36                          | 25                           | 15                           | 2                                | 11                                   |
| <i>Petrochromis macrognathus</i>         | Zm 03532        | Kasenga, Zambia                                        | —         | Non-type | Male   | 110.2                | 39.2            | 36.3             | 17.3                         | 14.6                        | 62.8                        | 21.5                      | 29.7                     | 31.8                   | 25.1                                | 28.5                               | 19.1            | 15.8              | 8.8             | 11.3                    | 8.6                   | 4.7                       | —                  | —                 | —                                      | —                                     | 18                | 11                   | 3               | 9                  | 16                     | 36                          | 25                           | 13                           | 2                                | 11                                   |
| <i>Petrochromis macrognathus</i>         | Zm 0127         | Kasenga, Zambia                                        | —         | Non-type | Male   | 93.2                 | 35.8            | 31.0             | 13.9                         | 13.3                        | 54.8                        | 17.2                      | 25.6                     | 30.2                   | 22.8                                | 25.7                               | 16.4            | 13.3              | 8.1             | 10.2                    | 8.5                   | 2.9                       | —                  | —                 | —                                      | —                                     | 17                | 12                   | 3               | 8                  | 17                     | 36                          | 25                           | 16                           | 2                                | 11                                   |
| <i>Petrochromis macrognathus</i>         | Zm 0323         | Kasenga, Zambia                                        | —         | Non-type | Female | 117.5                | 47.0            | 39.6             | 19.0                         | 16.0                        | 70.7                        | 22.7                      | 34.0                     | 37.1                   | 29.9                                | 34.9                               | 21.2            | 19.0              | 9.2             | 12.5                    | 10.2                  | 3.9                       | —                  | —                 | —                                      | —                                     | 18                | 12                   | 3               | 9                  | 17                     | 36                          | 25                           | 17                           | 2                                | 12                                   |
| <i>Petrochromis macrognathus</i>         | HUMZ 122890     | Cape Kanchese, Sumbu, Zambia                           | —         | Non-type | Female | 127.8                | 45.8            | 42.8             | 18.7                         | 16.5                        | 73.4                        | 23.8                      | 36.0                     | 44.0                   | 31.5                                | 35.7                               | 21.1            | 20.5              | 11.1            | 13.4                    | 11.6                  | 3.5                       | —                  | —                 | —                                      | —                                     | 18                | 11                   | 3               | 9                  | 16                     | 36                          | 25                           | 15                           | 2                                | 12                                   |
| <i>Petrochromis macrognathus</i>         | HUMZ 122901     | Cape Kanchese, Sumbu, Zambia                           | —         | Non-type | Male   | 178.7                | 65.7            | 61.9             | 26.9                         | 22.5                        | 103.5                       | 35.7                      | 50.6                     | 63.1                   | 41.1                                | 49.8                               | 30.2            | 30.0              | 13.2            | 18.0                    | 14.5                  | 6.1                       | —                  | —                 | —                                      | —                                     | 18                | 11                   | 3               | 10                 | 17                     | 36                          | 24                           | 17                           | 2                                | 12                                   |
| <i>Petrochromis macrognathus</i>         | HUMZ 138694     | Kahoma (?), D. R. Congo                                | —         | Non-type | Male   | 147.7                | 52.9            | 49.5             | 26.6                         | 18.0                        | 83.4                        | 25.5                      | 39.2                     | 49.7                   | 31.3                                | 39.5                               | 25.1            | 22.0              | 11.5            | 16.2                    | 12.2                  | 5.4                       | —                  | —                 | —                                      | —                                     | 18                | 11                   | 3               | 8                  | 16                     | 36                          | 25                           | 17                           | 2                                | 14                                   |
| <i>Petrochromis orthognathus</i>         | MRAC 125.150    | Bemba, km 155 route Uvira-Baraka, D. R. Congo          | 2-5       | Holotype | Male   | 131.7                | 52.2            | 41.4             | 19.7                         | 14.8                        | 82.5                        | 23.0                      | 44.7                     | 45.6                   | 27.3                                | 32.1                               | 23.9            | 18.7              | 10.5            | 14.1                    | 11.4                  | 0.7                       | —                  | —                 | —                                      | —                                     | 19                | 9                    | 3               | 7                  | 16                     | 32                          | 23                           | 12                           | 2                                | 14                                   |
| <i>Petrochromis orthognathus</i>         | MRAC 125180     | Entre Albertville et le camp Jacques, D. R. Congo      | —         | Non-type | Male   | 150.5                | 54.9            | 46.6             | 22.9                         | 17.3                        | 90.2                        | 25.6                      | 49.6                     | 55.7                   | 31.5                                | 35.1                               | 25.5            | 20.0              | 13.1            | 15.8                    | 14.0                  | 0.3                       | —                  | —                 | —                                      | —                                     | 18                | 10                   | 3               | 7                  | 15                     | 31                          | 22                           | 11                           | 2                                | 14                                   |
| <i>Petrochromis orthognathus</i>         | HUMZ 116553     | Pemba, D. R. Congo                                     | —         | Non-type | Male   | 99.3                 | 40.6            | 32.6             | 13.5                         | 12.0                        | 63.3                        | 16.8                      | 38.2                     | 36.2                   | 24.3                                | 25.6                               | 18.6            | 13.1              | 9.5             | 11.1                    | 9.5                   | 0.5                       | —                  | —                 | —                                      | —                                     | 19                | 9                    | 3               | 7                  | 16                     | 32                          | 23                           | 9                            | 2                                | 12                                   |
| <i>Petrochromis orthognathus</i>         | HUMZ 116674     | Pemba, D. R. Congo                                     | —         | Non-type | Female | 129.9                | 51.2            | 41.7             | 18.0                         | 14.7                        | 77.0                        | 20.6                      | 39.4                     | 39.5                   | 26.7                                | 30.5                               | 22.5            | 18.0              | 11.9            | 15.3                    | 12.8                  | 0.7                       | —                  | —                 | —                                      | —                                     | 18                | 9                    | 3               | 7                  | 14                     | 33                          | 23                           | 11                           | 2                                | 13                                   |
| <i>Petrochromis orthognathus</i>         | HUMZ 118079     | Pemba, D. R. Congo                                     | —         | Non-type | Female | 92.7                 | 37.7            | 29.2             | 13.6                         | 10.7                        | 59.4                        | 15.0                      | 32.7                     | 29.9                   | 21.0                                | 23.0                               | 16.5            | 11.9              | 8.2             | 9.8                     | 8.4                   | 0.4                       | —                  | —                 | —                                      | —                                     | 19                | 10                   | 3               | 7                  | 15                     | 33                          | 24                           | 11                           | 2                                | 13                                   |
| <i>Petrochromis orthognathus</i>         | HUMZ 118086     | Pemba, D. R. Congo                                     | —         | Non-type | Female | 107.1                | 42.1            | 34.5             | 15.8                         | 12.2                        | 66.0                        | 18.5                      | 36.9                     | 34.4                   | 22.5                                | 25.1                               | 18.6            | 14.8              | 9.6             | 11.6                    | 9.8                   | 0.7                       | —                  | —                 | —                                      | —                                     | 19                | 9                    | 3               | 7                  | 15                     | 33                          | 23                           | 11                           | 2                                | 13                                   |
| <i>Petrochromis orthognathus</i>         | HUMZ 127387     | Gitaza, Burundi                                        | 12        | Non-type | Female | 108.5                | 44.2            | 35.2             | 15.5                         | 12.3                        | 64.9                        | 17.2                      | 35.9                     | 32.9                   | 23.8                                | 25.9                               | 19.3            | 15.7              | 10.0            | 12.5                    | 10.0                  | 0.4                       | —                  | —                 | —                                      | —                                     | 19                | 8                    | 3               | 7                  | 15                     | 32                          | 24                           | 10                           | 2                                | 13                                   |
| <i>Petrochromis orthognathus</i>         | HUMZ 127388     | Gitaza, Burundi                                        | 12        | Non-type | Male   | 123.9                | 49.8            | 39.4             | 19.3                         | 14.6                        | 77.9                        | 21.4                      | 42.3                     | 46.6                   | 26.0                                | 29.5                               | 23.1            | 16.3              | 11.0            | 14.3                    | 11.8                  | 0.8                       | —                  | —                 | —                                      | —                                     | 18                | 9                    | 3               | 7                  | 15                     | 31                          | 21                           | 10                           | 2                                | 14                                   |
| <i>Petrochromis orthognathus</i>         | HUMZ 127390     | Gitaza, Burundi                                        | 12        | Non-type | Female | 101.1                | 42.0            | 32.6             | 14.7                         | 12.5                        | 60.8                        | 16.9                      | 32.6                     | 30.0                   | 22.2                                | 23.4                               | 17.5            | 13.1              | 9.4             | 11.1                    | 8.7                   | 0.7                       | —                  | —                 | —                                      | —                                     | 19                | 8                    | 3               | 7                  | 14                     | 32                          | 22                           | 11                           | 2                                | 11                                   |
| <i>Petrochromis orthognathus</i>         | HUMZ 127423     | Moguruka near Nyanza, Burundi                          | —         | Non-type | Female | 99.8                 | 38.0            | 32.9             | 14.4                         | 11.4                        | 60.5                        | 17.6                      | 35.6                     | 29.2                   | 21.6                                | 23.5                               | 17.7            | 13.0              | 10.0            | 10.6                    | 10.2                  | 0.5                       | —                  | —                 | —                                      | —                                     | 18                | 10                   | 3               | 7                  | 16                     | 32                          | 23                           | 11                           | 2                                | 13                                   |
| <i>Petrochromis orthognathus</i>         | HUMZ 127426     | Moguruka near Nyanza, Burundi                          | —         | Non-type | Male   | 109.9                | 41.5            | 33.6             | 15.0                         | 12.9                        | 69.2                        | 19.8                      | 38.1                     | 35.1                   | 27.1                                | 28.3                               | 19.2            | 14.5              | 10.1            | 11.5                    | 9.1                   | 0.9                       | —                  | —                 | —                                      | —                                     | 19                | 9                    | 3               | 7                  | 16                     | 33                          | 23                           | 11                           | 2                                | 14                                   |
| <i>Petrochromis orthognathus</i>         | HUMZ 127427     | Moguruka near Nyanza, Burundi                          | —         | Non-type | Male   | 130.4                | 49.2            | 39.8             | 19.3                         | 15.0                        | 81.8                        | 24.1                      | 42.6                     | 39.5                   | 28.6                                | 31.4                               | 22.8            | 16.7              | 11.6            | 14.3                    | 12.1                  | 0.4                       | —                  | —                 | —                                      | —                                     | 18                | 9                    | 3               | 7                  | 15                     | 32                          | 23                           | 11                           | 2                                | 13                                   |
| <i>Petrochromis orthognathus</i>         | HUMZ 127510     | Moguruka near Nyanza, Burundi                          | —         | Non-type | Male   | 134.9                | 50.5            | 41.4             | 19.6                         | 15.3                        | 83.3                        | 22.6                      | 44.7                     | 57.9                   | 29.0                                | 32.4                               | 23.0            | 17.2              | 12.2            | 14.5                    | 11.8                  | 1.0                       | —                  | —                 | —                                      | —                                     | 18                | 9                    | 3               | 7                  | 16                     | 32                          | 23                           | 11                           | 2                                | 11                                   |
| <i>Petrochromis orthognathus</i>         | HUMZ 127511     | Moguruka near Nyanza, Burundi                          | —         | Non-type | Male   | 97.2                 | 36.9            | 30.2             | 14.1                         | 11.8                        | 61.6                        | 17.3                      | 30.2                     | 33.9                   | 21.5                                | 23.4                               | 17.0            | 12.1              | 9.3             | 10.4                    | 8.7                   | 0.6                       | —                  | —                 | —                                      | —                                     | 19                | 9                    | 3               | 7                  | 15                     | 32                          | 24                           | 10                           | 2                                | 12                                   |
| <i>Petrochromis orthognathus</i>         | HUMZ 127697     | Muzimu, D. R. Congo                                    | 4-5       | Non-type | Female | 116.0                | 43.0            | 39.1             | 18.0                         | 12.9                        | 67.8                        | 18.6                      | 40.5                     | 36.4                   | 24.9                                | —                                  | 19.7            | 14.8              | 11.5            | 12.0                    | 9.8                   | —                         | —                  | —                 | —                                      | —                                     | 18                | 9                    | 3               | 7                  | 15                     | 32                          | 23                           | 9                            | 2                                | 11                                   |
| <i>Petrochromis orthognathus</i>         | HUMZ 127699     | Muzimu, D. R. Congo                                    | 4-5       | Non-type | Female | 92.6                 | 37.5            | 29.5             | 13.1                         | 11.4                        | 59.1                        | 15.4                      | 34.0                     | 30.0                   | 21.1                                | 23.5                               | 17.5            | 11.7              | 9.6             | 10.3                    | 9.4                   | 0.5                       | —                  | —                 | —                                      | —                                     | 19                | 9                    | 3               | 7                  | 16                     | 32                          | 25                           | 11                           | 2                                | 13                                   |
| <i>Petrochromis orthognathus</i>         | HUMZ 127714     | Muzimu, D. R. Congo                                    | 4-5       | Non-type | Male   | 105.9                | 43.6            | 33.7             | 14.6                         | 12.9                        | 68.6                        | 17.4                      | 38.8                     | 42.6                   | 24.3                                | 27.4                               | 19.0            | 13.9              | 9.7             | 12.0                    | 10.5                  | 0.8                       | —                  | —                 | —                                      | —                                     | 19                | 8                    | 3               | 7                  | 15                     | 32                          | 23                           | 11                           | 2                                | 12                                   |
| <i>Petrochromis orthognathus</i>         | HUMZ 127719     | Muzimu, D. R. Congo                                    | 4-5       | Non-type | Male   | 124.0                | 48.2            | 38.2             | 19.1                         | 14.3                        | 81.2                        | 19.9                      | 42.4                     | 44.9                   | 27.9                                | 30.5                               | 22.6            | 16.2              | 10.7            | 13.5                    | 11.1                  | 0.5                       | —                  | —                 | —                                      | —                                     | 20                | 8                    | 3               | 7                  | 15                     | 33                          | 24                           | 11                           | 2                                | 14                                   |
| <i>Petrochromis orthognathus</i>         | HUMZ 127720     | Muzimu, D. R. Congo                                    | 4-5       | Non-type | Male   | 134.8                | 50.6            | 41.1             | 19.3                         | 15.0                        | 83.3                        | 22.5                      | 45.2                     | 49.7                   | 28.5                                | 32.7                               | 23.6            | 17.5              | 11.3            | 14.6                    | 10.7                  | 1.2                       | —                  | —                 | —                                      | —                                     | 19                | 9                    | 3               | 7                  | 15                     | 33                          | 23                           | 12                           | 2                                | 12                                   |
| <i>Petrochromis orthognathus</i>         | TT 1213         | purchased in Katonga Marchet, Kigoma, Tanzania         | —         | Non-type | Female | 106.8                | 41.5            | 33.4             | 15.5                         | 13.2                        | 66.1                        | 19.9                      | 35.8                     | 30.1                   | 22.9                                | 25.0                               | 19.2            | 13.2              | 9.9             | 11.7                    | 10.4                  | 1.0                       | —                  | —                 | —                                      | —                                     | 19                | 9                    | 3               | 7                  | 16                     | 32                          | 23                           | 10                           | 2                                | 14                                   |
| <i>Petrochromis orthognathus</i> "ikola" | MRAC 92081.0592 | Mpimbwe Hills, southern part of Shashete Bay, Tanzania | —         | Non-type | Male   | 127.1                | 51.7            | 41.4             | 19.2                         | 13.7                        | 81.7                        | 22.6                      | 42.5                     | 45.0                   | 26.6                                | 29.2                               | 22.1            | 17.6              | 12.0            | 14.8                    | 12.0                  | 1.5                       | —                  | —                 | —                                      | —                                     | 19                | 9                    | 3               | 7                  | 16                     | 33                          | 23                           | 13                           | 2                                | 13                                   |
| <i>Petrochromis orthognathus</i> "ikola" | MRAC 92081.0743 | Just south of Karema, Tanzania                         | —         | Non-type | Female | 91.8                 | 36.4            | 30.8             | 14.1                         | 10.3                        | 57.0                        | 15.6                      | 33.2                     | 31.0                   | —                                   | —                                  | 15.4            | 11.6              | 9.5             | 9.7                     | 8.6                   | 1.2                       | —                  | —                 | —                                      | —                                     | 19                | 8                    | 3               | 7                  | 15                     | 32                          | 24                           | 12                           | 2                                | 12                                   |
| <i>Petrochromis orthognathus</i> "ikola" | MRAC 92081.0865 | Just south of Mkg                                      |           |          |        |                      |                 |                  |                              |                             |                             |                           |                          |                        |                                     |                                    |                 |                   |                 |                         |                       |                           |                    |                   |                                        |                                       |                   |                      |                 |                    |                        |                             |                              |                              |                                  |                                      |

Table S1 (Continued)

| Species                                       | Catalogue no. | Locality                                       | Depth (m) | Type     | Sex    | Standard length (mm) | Body depth (mm) | Head length (mm) | Caudal-pectuncle length (mm) | Caudal-pectuncle depth (mm) | Dorsal-fin-base length (mm) | Anal-fin-base length (mm) | Pectoral-fin length (mm) | Pelvic-fin length (mm) | Shortest caudal-fin-ray length (mm) | Longest caudal-fin-ray length (mm) | Head width (mm) | Snout length (mm) | Eye length (mm) | Interorbital width (mm) | Lower-jaw length (mm) | Upper-jaw protrusion (mm) | Length of LPJ (mm) | Width of LPJ (mm) | Length of dentigerous area on LPJ (mm) | Width of dentigerous area on LPJ (mm) | Dorsal-fin spines | Dorsal-fin soft rays | Anal-fin spines | Anal-fin soft rays | Pectoral-fin soft rays | Scales in longitudinal line | Scales on upper lateral line | Scales on lower lateral line | Scale rows between lateral lines | Gill rakers on first ceratobranchial |
|-----------------------------------------------|---------------|------------------------------------------------|-----------|----------|--------|----------------------|-----------------|------------------|------------------------------|-----------------------------|-----------------------------|---------------------------|--------------------------|------------------------|-------------------------------------|------------------------------------|-----------------|-------------------|-----------------|-------------------------|-----------------------|---------------------------|--------------------|-------------------|----------------------------------------|---------------------------------------|-------------------|----------------------|-----------------|--------------------|------------------------|-----------------------------|------------------------------|------------------------------|----------------------------------|--------------------------------------|
| <i>Petrochromis trewavasae ephippium</i>      | HUMZ 116592   | Pemba, D. R. Congo                             | —         | Non-type | Male   | 77.1                 | 32.2            | 25.4             | 10.8                         | 9.6                         | 47.1                        | 14.5                      | 25.5                     | 32.5                   | 18.9                                | 23.3                               | 13.9            | 11.1              | 7.5             | 8.7                     | 5.6                   | 1.7                       | —                  | —                 | —                                      | —                                     | 19                | 9                    | 3               | 7                  | 16                     | 34                          | 24                           | 12                           | 2                                | 12                                   |
| <i>Petrochromis trewavasae ephippium</i>      | HUMZ 116661   | Pemba, D. R. Congo                             | —         | Non-type | Female | 77.3                 | 32.9            | 26.1             | 11.5                         | 10.0                        | 48.2                        | 14.6                      | 28.3                     | 31.0                   | 19.6                                | 25.8                               | 14.3            | 10.5              | 7.7             | 9.0                     | 6.6                   | 1.6                       | —                  | —                 | —                                      | —                                     | 19                | 9                    | 3               | 7                  | 15                     | 34                          | 23                           | 13                           | 2                                | 10                                   |
| <i>Petrochromis trewavasae ephippium</i>      | HUMZ 127700   | Cape Muzimu, D. R. Congo                       | 4-5       | Non-type | Male   | 100.4                | 41.9            | 32.4             | 13.9                         | 12.5                        | 64.0                        | 17.9                      | 32.9                     | 40.3                   | 23.5                                | 30.1                               | 18.1            | 13.5              | 8.7             | 12.1                    | 9.8                   | 1.9                       | —                  | —                 | —                                      | —                                     | 19                | 9                    | 3               | 7                  | 16                     | 34                          | 25                           | 14                           | 2                                | 10                                   |
| <i>Petrochromis trewavasae ephippium</i>      | HUMZ 127921   | Cape Muzimu, D. R. Congo                       | 4-5       | Non-type | Male   | 153.3                | 59.3            | 49.5             | 24.3                         | 19.1                        | 92.7                        | 26.2                      | 53.8                     | 78.8                   | 33.9                                | 45.5                               | 29.1            | 23.0              | 12.2            | 18.7                    | 13.4                  | 2.9                       | —                  | —                 | —                                      | —                                     | 18                | 9                    | 3               | 7                  | 16                     | 35                          | 22                           | 13                           | 2                                | 11                                   |
| <i>Petrochromis trewavasae ephippium</i>      | HUMZ 127922   | Cape Muzimu, D. R. Congo                       | 4-5       | Non-type | Male   | 112.7                | 45.3            | 36.4             | 18.6                         | 13.8                        | 69.2                        | 18.7                      | 37.6                     | 46.0                   | 25.8                                | 34.0                               | 20.2            | 16.5              | 9.9             | 14.5                    | 9.3                   | 2.8                       | —                  | —                 | —                                      | —                                     | 19                | 9                    | 3               | 8                  | 15                     | 34                          | 24                           | 15                           | 2                                | 11                                   |
| <i>Petrochromis trewavasae ephippium</i>      | HUMZ 136368   | Pemba, D. R. Congo                             | 0.5       | Non-type | Female | 145.3                | 58.2            | 47.2             | 23.0                         | 17.1                        | 86.5                        | 24.7                      | 46.0                     | 57.3                   | 33.4                                | 48.4                               | 25.4            | 21.4              | 11.9            | 16.8                    | 11.9                  | 3.3                       | —                  | —                 | —                                      | —                                     | 19                | 10                   | 3               | 7                  | 16                     | 35                          | 24                           | 11                           | 2                                | 10                                   |
| <i>Petrochromis trewavasae ephippium</i>      | HUMZ 138051   | Pemba, D. R. Congo                             | —         | Non-type | Female | 84.0                 | 35.4            | 27.3             | 11.4                         | 10.5                        | 51.3                        | 15.0                      | 27.6                     | 30.7                   | 20.7                                | 27.0                               | 15.7            | 11.2              | 8.2             | 10.0                    | 6.9                   | 2.3                       | —                  | —                 | —                                      | —                                     | 18                | 10                   | 3               | 7                  | 16                     | 34                          | 22                           | 14                           | 2                                | 9                                    |
| <i>Petrochromis trewavasae ephippium</i>      | HUMZ 138053   | Pemba, D. R. Congo                             | —         | Non-type | Female | 125.1                | 51.2            | 40.6             | 19.0                         | 15.8                        | 78.5                        | 21.6                      | 39.5                     | 57.3                   | 28.9                                | 37.7                               | 21.9            | 17.9              | 10.0            | 14.5                    | 10.1                  | 2.1                       | —                  | —                 | —                                      | —                                     | 19                | 9                    | 3               | 7                  | 15                     | 34                          | 22                           | 13                           | 2                                | 11                                   |
| <i>Petrochromis trewavasae ephippium</i>      | Zm 93793-a    | Kasenga, Zambia                                | 1-3       | Non-type | Female | 141.0                | 57.4            | 50.2             | 21.5                         | 17.6                        | 87.0                        | 24.8                      | 44.8                     | 54.0                   | 31.0                                | 41.7                               | 23.4            | 22.7              | 11.5            | 17.9                    | 12.7                  | 4.6                       | —                  | —                 | —                                      | —                                     | 19                | 9                    | 3               | 7                  | 16                     | 35                          | 24                           | 16                           | 2                                | 10                                   |
| <i>Petrochromis trewavasae ephippium</i>      | Zm 93793-b    | Kasenga, Zambia                                | 1-3       | Non-type | Female | 128.9                | 56.2            | 44.2             | 20.5                         | 16.2                        | 83.1                        | 22.5                      | 43.0                     | 50.1                   | 29.3                                | 38.1                               | 23.0            | 19.9              | 10.8            | 16.8                    | 11.2                  | 2.4                       | —                  | —                 | —                                      | —                                     | 18                | 9                    | 3               | 7                  | 15                     | 34                          | 24                           | 15                           | 2                                | 10                                   |
| <i>Petrochromis trewavasae ephippium</i>      | Zm 93793-c    | Kasenga, Zambia                                | 1-3       | Non-type | Female | 132.5                | 54.3            | 47.3             | 21.5                         | 17.4                        | 84.0                        | 24.6                      | 41.8                     | 54.8                   | 29.5                                | 38.0                               | 24.6            | 21.2              | 11.4            | 17.2                    | 13.2                  | 3.3                       | —                  | —                 | —                                      | —                                     | 19                | 8                    | 3               | 7                  | 15                     | 35                          | 25                           | 14                           | 2                                | 12                                   |
| <i>Petrochromis trewavasae ephippium</i>      | Zm 93793-d    | Kasenga, Zambia                                | 1-3       | Non-type | Male   | 127.1                | 52.8            | 42.4             | 15.6                         | 16.1                        | 82.0                        | 23.4                      | 42.0                     | 53.7                   | 28.0                                | 36.6                               | 22.2            | 20.4              | 10.0            | 14.9                    | 11.3                  | 3.7                       | —                  | —                 | —                                      | —                                     | 19                | 9                    | 3               | 8                  | 15                     | 34                          | 25                           | 13                           | 2                                | 11                                   |
| <i>Petrochromis trewavasae ephippium</i>      | Zm 93793-e    | Kasenga, Zambia                                | 1-3       | Non-type | Female | 125.0                | 48.0            | 40.6             | 18.3                         | 14.8                        | 79.7                        | 22.8                      | 39.7                     | 44.4                   | 27.1                                | 35.5                               | 21.7            | 18.6              | 10.5            | 14.7                    | 9.8                   | 2.9                       | —                  | —                 | —                                      | —                                     | 19                | 9                    | 3               | 7                  | 15                     | 35                          | 24                           | 13                           | 2                                | 10                                   |
| <i>Petrochromis trewavasae ephippium</i>      | Zm 93793-f    | Kasenga, Zambia                                | 1-3       | Non-type | Male   | 98.9                 | 42.9            | 32.9             | 15.0                         | 12.4                        | 65.0                        | 17.5                      | 30.7                     | 31.9                   | 22.9                                | 28.0                               | 17.4            | 13.8              | 9.0             | 12.2                    | 8.7                   | 2.6                       | —                  | —                 | —                                      | —                                     | 19                | 9                    | 3               | 7                  | 15                     | 35                          | 23                           | 15                           | 2                                | 14                                   |
| <i>Petrochromis trewavasae ephippium</i>      | Zm 93793-g    | Kasenga, Zambia                                | 1-3       | Non-type | Male   | 94.4                 | 41.4            | 32.8             | 12.4                         | 12.0                        | 62.9                        | 17.2                      | 31.9                     | 36.3                   | 22.7                                | 27.3                               | 17.2            | 14.0              | 9.0             | 11.5                    | 7.6                   | 2.3                       | —                  | —                 | —                                      | —                                     | 19                | 9                    | 3               | 7                  | 15                     | 34                          | 23                           | 13                           | 2                                | 12                                   |
| <i>Petrochromis trewavasae ephippium</i>      | Zm 93793-h    | Kasenga, Zambia                                | 1-3       | Non-type | Female | 86.6                 | 37.0            | 29.1             | 13.4                         | 10.9                        | 53.7                        | 15.0                      | 28.5                     | 33.7                   | 20.2                                | 24.5                               | 15.0            | 12.1              | 8.0             | 10.0                    | 7.0                   | 2.7                       | —                  | —                 | —                                      | —                                     | 18                | 9                    | 3               | 7                  | 15                     | 34                          | 23                           | 13                           | 2                                | 10                                   |
| <i>Petrochromis trewavasae</i> "Moshi Yellow" | TT 1214       | purchased in Katonga Marchet, Kigoma, Tanzania | —         | Non-type | Male   | 130.8                | 52.6            | 42.4             | 19.7                         | 15.9                        | 78.9                        | 23.6                      | 43.4                     | 50.7                   | 30.3                                | 37.8                               | 22.4            | 20.5              | 10.5            | 15.5                    | 11.0                  | 3.3                       | —                  | —                 | —                                      | —                                     | 19                | 8                    | 3               | 7                  | 15                     | 34                          | 26                           | 14                           | 2                                | 12                                   |
| <i>Petrochromis trewavasae</i> "Moshi Yellow" | TT 1215       | purchased in Katonga Marchet, Kigoma, Tanzania | —         | Non-type | Male   | 113.0                | 44.2            | 37.1             | 16.5                         | 14.1                        | 70.5                        | 23.5                      | 37.6                     | 43.9                   | 25.4                                | 33.3                               | 20.3            | 16.2              | 9.6             | 13.4                    | 9.9                   | 3.0                       | —                  | —                 | —                                      | —                                     | 19                | 9                    | 3               | 8                  | 15                     | 34                          | 23                           | 14                           | 2                                | 13                                   |

BMNH: The Natural History Museum, London, UK

FAKU: Fish collection of Kyoto University, Kyoto and Maizuru, Japan

HUMZ: Laboratory of Marine Biodiversity, Graduate School of Fisheries Science, Hokkaido University, Hakodate, Japan

LPJ: Lower pharyngeal jaw

MRAC: Royal Museum for Central Africa, Tervuren, Belgium

NSMT-P: Department of Zoology, National Science Museum, Tokyo, Japan

TT: private collection of T. Takahashi, Kyoto University, Kyoto, Japan

Z, Zm: private collection of M. Hori, Kyoto University, Kyoto, Japan
